# Supplementary material for: Synthesis and structure of dinuclear hafnium(IV) and zirconium(IV) complexes sandwiched between 2 mono-lacunary α-Keggin polyoxometalates
Source: Royal Society of Chemistry journal article supplement (doi:10.1039/b902296a), 2009-01-01
Supplement: b902296a.pdf [file b902296a.pdf]

## Electronic Supplementary Information (ESI)

Ver. 1.02 (09-4-14)

### Synthesis and structure of dinuclear hafnium(IV) and zirconium(IV) complexes sandwiched between 2 mono-lacunary $\alpha$ -Keggin polyoxometalates†

Kenji Nomiya, Yoshio Saku, Shingo Yamada, Wataru Takahashi, Hiromi Sekiya,  
Akira Shinohara, Megumi Ishimaru and Yoshitaka Sakai

*Department of Materials Science, Faculty of Science, Kanagawa University,  
Hiratsuka, Kanagawa 259-1293, Japan*

#### Contents:

**Fig. S1** (a) Molecular structure of the polyoxoanion [ $\{\alpha\text{-PW}_{11}\text{O}_{39}\text{Zr}(\mu\text{-OH})(\text{H}_2\text{O})\}_2\text{]}^{8-}$  (2) in  $\text{Et}_2\text{NH}_2\cdot 2$ , (b) its polyhedral representation, and (c) the partial structure around the  $\text{Zr}_2$  center. In (b), the 2  $\text{ZrO}_7$  polyhedra with the 2 bridging oxygen atoms are shown in green, all 22  $\text{WO}_6$  octahedra are shown in dark gray, and the 2 central  $\text{PO}_4$  groups are shown in yellow.

**Table S1** Bond lengths (Å) and angles (°) for 1

**Table S2** Bond lengths (Å) and angles (°) for 2

**Table S3** Bond valence sum (BVS) calculations of W, Hf, O and P atoms for **1** in Et<sub>2</sub>NH<sub>2</sub>-1

**Table S4** Bond valence sum (BVS) calculations of W, Zr, O and P atoms for **2** in Et<sub>2</sub>NH<sub>2</sub>-2

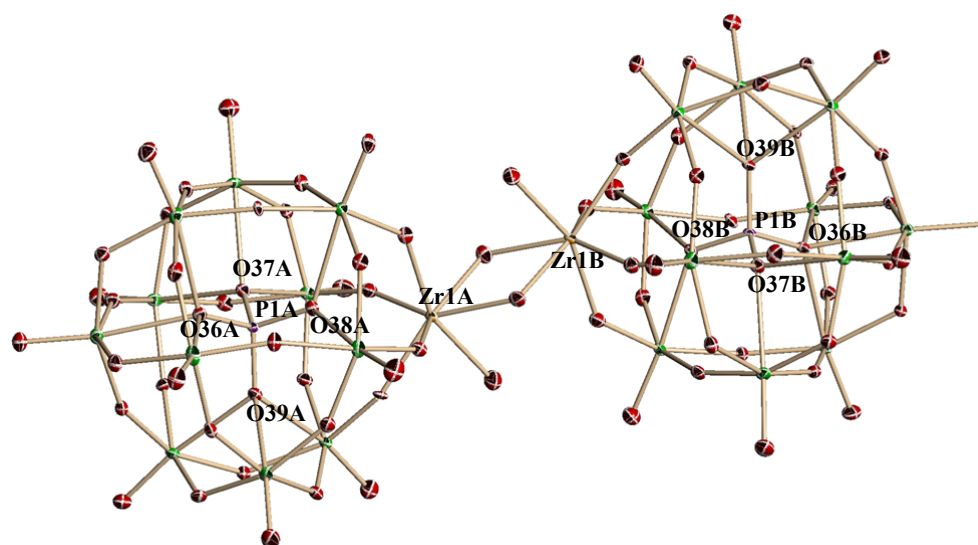

(a)

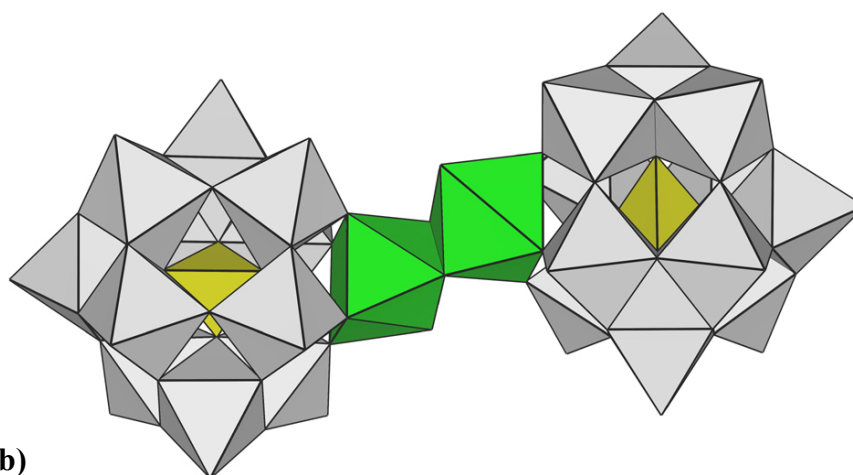

(b)

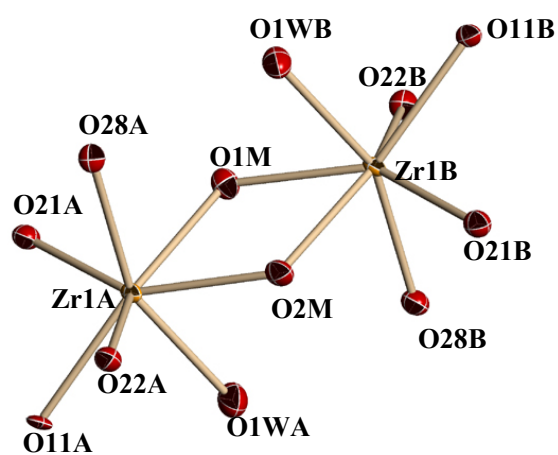

(c)

**Fig. S1**

**Table S1** Bond lengths (Å) and angles (°) for **1**

---

| W-O <sub>t</sub> (O <sub>t</sub> : terminal oxygen) |           |               |           |
|-----------------------------------------------------|-----------|---------------|-----------|
| W(1A)-O(1A)                                         | 1.720(15) | W(1B)-O(1B)   | 1.682(14) |
| W(2A)-O(2A)                                         | 1.716(14) | W(2B)-O(2B)   | 1.718(13) |
| W(3A)-O(3A)                                         | 1.705(13) | W(3B)-O(3B)   | 1.708(13) |
| W(4A)-O(13A)                                        | 1.722(14) | W(4B)-O(13B)  | 1.705(13) |
| W(5A)-O(14A)                                        | 1.742(14) | W(5B)-O(14B)  | 1.745(14) |
| W(6A)-O(15A)                                        | 1.691(13) | W(6B)-O(15B)  | 1.701(13) |
| W(7A)-O(16A)                                        | 1.699(15) | W(7B)-O(16B)  | 1.735(14) |
| W(8A)-O(17A)                                        | 1.717(14) | W(8B)-O(17B)  | 1.695(13) |
| W(9A)-O(30A)                                        | 1.706(14) | W(9B)-O(30B)  | 1.715(14) |
| W(10A)-O(31A)                                       | 1.699(14) | W(10B)-O(31B) | 1.691(15) |
| W(11A)-O(32A)                                       | 1.699(13) | W(11B)-O(32B) | 1.720(14) |
| average = 1.711 [1.682(14)-1.745(14)]               |           |               |           |

---

| W-O <sub>c</sub> (O <sub>c</sub> : corner-sharing oxygen) |           |               |           |
|-----------------------------------------------------------|-----------|---------------|-----------|
| W(1A)-O(7A)                                               | 1.903(14) | W(1B)-O(7B)   | 1.869(12) |
| W(1A)-O(12A)                                              | 1.883(13) | W(1B)-O(12B)  | 1.874(13) |
| W(2A)-O(8A)                                               | 1.985(13) | W(2B)-O(8B)   | 1.967(12) |
| W(2A)-O(9A)                                               | 1.891(12) | W(2B)-O(9B)   | 1.911(12) |
| W(3A)-O(10A)                                              | 1.910(13) | W(3B)-O(10B)  | 1.929(12) |
| W(3A)-O(11A)                                              | 1.802(13) | W(3B)-O(11B)  | 1.805(12) |
| W(4A)-O(23A)                                              | 1.843(13) | W(4B)-O(23B)  | 1.876(13) |
| W(4A)-O(7A)                                               | 1.919(13) | W(4B)-O(7B)   | 1.942(12) |
| W(5A)-O(19A)                                              | 1.917(13) | W(5B)-O(19B)  | 1.906(13) |
| W(5A)-O(8A)                                               | 1.862(13) | W(5B)-O(8B)   | 1.873(12) |
| W(6A)-O(19A)                                              | 1.899(13) | W(6B)-O(19B)  | 1.919(13) |
| W(6A)-O(9A)                                               | 1.922(13) | W(6B)-O(9B)   | 1.910(12) |
| W(7A)-O(21A)                                              | 1.800(12) | W(7B)-O(21B)  | 1.801(12) |
| W(7A)-O(10A)                                              | 1.930(13) | W(7B)-O(10B)  | 1.927(12) |
| W(8A)-O(22A)                                              | 1.807(14) | W(8B)-O(22B)  | 1.813(14) |
| W(8A)-O(23A)                                              | 2.018(13) | W(8B)-O(23B)  | 1.985(13) |
| W(8A)-O(12A)                                              | 1.928(13) | W(8B)-O(12B)  | 1.934(13) |
| W(9A)-O(33A)                                              | 1.856(13) | W(9B)-O(33B)  | 1.886(13) |
| W(9A)-O(34A)                                              | 1.926(12) | W(9B)-O(34B)  | 1.939(14) |
| W(10A)-O(34A)                                             | 1.883(13) | W(10B)-O(34B) | 1.880(14) |

**Table S1 continued**

|                                                         |           |               |           |
|---------------------------------------------------------|-----------|---------------|-----------|
| W(10A)-O(35A)                                           | 1.881(12) | W(10B)-O(35B) | 1.856(13) |
| W(11A)-O(35A)                                           | 1.959(11) | W(11B)-O(35B) | 1.962(12) |
| W(11A)-O(33A)                                           | 1.986(13) | W(11B)-O(33B) | 1.950(13) |
| W(11A)-O(28A)                                           | 1.837(13) | W(11B)-O(28B) | 1.821(14) |
| average = 1.898 [1.800(12)-2.018(13)]                   |           |               |           |
| W-O <sub>e</sub> (O <sub>e</sub> : edge-sharing oxygen) |           |               |           |
| W(1A)-O(4A)                                             | 1.933(13) | W(1B)-O(4B)   | 1.926(13) |
| W(1A)-O(6A)                                             | 1.942(14) | W(1B)-O(6B)   | 1.949(13) |
| W(2A)-O(5A)                                             | 1.852(13) | W(2B)-O(5B)   | 1.854(13) |
| W(2A)-O(4A)                                             | 1.944(13) | W(2B)-O(4B)   | 1.906(12) |
| W(3A)-O(6A)                                             | 1.926(13) | W(3B)-O(6B)   | 1.929(13) |
| W(3A)-O(5A)                                             | 1.999(13) | W(3B)-O(5B)   | 1.999(13) |
| W(4A)-O(24A)                                            | 1.918(14) | W(4B)-O(24B)  | 1.890(14) |
| W(4A)-O(18A)                                            | 1.978(13) | W(4B)-O(18B)  | 1.947(12) |
| W(5A)-O(25A)                                            | 1.994(12) | W(5B)-O(25B)  | 1.970(12) |
| W(5A)-O(18A)                                            | 1.905(12) | W(5B)-O(18B)  | 1.910(11) |
| W(6A)-O(26A)                                            | 1.911(12) | W(6B)-O(26B)  | 1.918(14) |
| W(6A)-O(20A)                                            | 1.858(13) | W(6B)-O(20B)  | 1.872(14) |
| W(7A)-O(27A)                                            | 1.949(12) | W(7B)-O(27B)  | 1.944(13) |
| W(7A)-O(20A)                                            | 1.968(13) | W(7B)-O(20B)  | 1.966(13) |
| W(8A)-O(29A)                                            | 1.919(13) | W(8B)-O(29B)  | 1.916(13) |
| W(9A)-O(25A)                                            | 1.932(13) | W(9B)-O(25B)  | 1.932(13) |
| W(9A)-O(24A)                                            | 1.915(13) | W(9B)-O(24B)  | 1.957(14) |
| W(10A)-O(26A)                                           | 1.981(12) | W(10B)-O(26B) | 1.921(14) |
| W(10A)-O(27A)                                           | 1.912(12) | W(10B)-O(27B) | 1.944(13) |
| W(11A)-O(29A)                                           | 1.933(13) | W(11B)-O(29B) | 1.911(13) |
| average = 1.931 [1.854(12)-1.999(13)]                   |           |               |           |
| W-O <sub>a</sub> (oxygen coordinating to P atom)        |           |               |           |
| W(1A)-O(39A)                                            | 2.415(13) | W(1B)-O(39B)  | 2.424(12) |
| W(2A)-O(39A)                                            | 2.517(14) | W(2B)-O(39B)  | 2.474(12) |
| W(3A)-O(39A)                                            | 2.397(14) | W(3B)-O(39B)  | 2.429(12) |
| W(4A)-O(36A)                                            | 2.425(11) | W(4B)-O(36B)  | 2.461(11) |
| W(5A)-O(36A)                                            | 2.386(12) | W(5B)-O(36B)  | 2.357(12) |
| W(6A)-O(37A)                                            | 2.467(12) | W(6B)-O(37B)  | 2.471(12) |
| W(7A)-O(37A)                                            | 2.434(12) | W(7B)-O(37B)  | 2.437(12) |

**Table S1** continued

|                     |           |                                       |           |
|---------------------|-----------|---------------------------------------|-----------|
| W(8A)-O(38A)        | 2.353(11) | W(8B)-O(38B)                          | 2.378(11) |
| W(9A)-O(36A)        | 2.471(12) | W(9B)-O(36B)                          | 2.463(12) |
| W(10A)-O(37A)       | 2.408(12) | W(10B)-O(37B)                         | 2.396(12) |
| W(11A)-O(38A)       | 2.379(12) | W(11B)-O(38B)                         | 2.390(12) |
|                     |           | average = 2.424 [2.353(11)-2.517(14)] |           |
| <hr/>               |           |                                       |           |
| P-O                 |           |                                       |           |
| P(1A)-O(36A)        | 1.533(13) | P(1B)-O(36B)                          | 1.550(13) |
| P(1A)-O(37A)        | 1.551(12) | P(1B)-O(37B)                          | 1.545(12) |
| P(1A)-O(38A)        | 1.523(13) | P(1B)-O(38B)                          | 1.495(13) |
| P(1A)-O(39A)        | 1.536(14) | P(1B)-O(39B)                          | 1.541(13) |
|                     |           | average = 1.534 [1.495(13)-1.551(12)] |           |
| <hr/>               |           |                                       |           |
| O-P-O               |           |                                       |           |
|                     |           | O(38B)-P(1B)-O(36B                    |           |
| O(38A)-P(1A)-O(36A) | 109.4(7)  | )                                     | 111.0(7)  |
|                     |           | O(38B)-P(1B)-O(39B                    |           |
| O(38A)-P(1A)-O(39A) | 109.8(7)  | )                                     | 110.8(7)  |
|                     |           | O(36B)-P(1B)-O(39B                    |           |
| O(36A)-P(1A)-O(39A) | 108.5(7)  | )                                     | 107.5(7)  |
|                     |           | O(38B)-P(1B)-O(37B                    |           |
| O(38A)-P(1A)-O(37A) | 109.9(7)  | )                                     | 110.5(7)  |
|                     |           | O(36B)-P(1B)-O(37B                    |           |
| O(36A)-P(1A)-O(37A) | 109.3(7)  | )                                     | 107.4(7)  |
|                     |           | O(39B)-P(1B)-O(37B                    |           |
| O(39A)-P(1A)-O(37A) | 109.9(7)  | )                                     | 109.6(7)  |
|                     |           | average = 109.5 [107.4(7)-111.0(7)]   |           |
| <hr/>               |           |                                       |           |

**Table S2** Bond lengths (Å) and angles (°) for **2**

---

| W-O <sub>t</sub> (O <sub>t</sub> : terminal oxygen) |           |               |           |
|-----------------------------------------------------|-----------|---------------|-----------|
| W(1A)-O(1A)                                         | 1.698(10) | W(1B)-O(1B)   | 1.705(10) |
| W(2A)-O(2A)                                         | 1.688(11) | W(2B)-O(2B)   | 1.704(10) |
| W(3A)-O(3A)                                         | 1.707(11) | W(3B)-O(3B)   | 1.704(10) |
| W(4A)-O(13A)                                        | 1.698(10) | W(4B)-O(13B)  | 1.709(10) |
| W(5A)-O(14A)                                        | 1.719(11) | W(5B)-O(14B)  | 1.713(10) |
| W(6A)-O(15A)                                        | 1.705(11) | W(6B)-O(15B)  | 1.681(11) |
| W(7A)-O(16A)                                        | 1.703(11) | W(7B)-O(16B)  | 1.720(10) |
| W(8A)-O(17A)                                        | 1.716(11) | W(8B)-O(17B)  | 1.707(11) |
| W(9A)-O(30A)                                        | 1.705(11) | W(9B)-O(30B)  | 1.707(10) |
| W(10A)-O(31A)                                       | 1.725(11) | W(10B)-O(31B) | 1.711(10) |
| W(11A)-O(32A)                                       | 1.706(10) | W(11B)-O(32B) | 1.718(10) |
| average = 1.706 [1.681(11)-1.725(11)]               |           |               |           |

---

| W-O <sub>c</sub> (O <sub>c</sub> : corner-sharing oxygen) |           |               |           |
|-----------------------------------------------------------|-----------|---------------|-----------|
| W(1A)-O(7A)                                               | 1.890(10) | W(1B)-O(7B)   | 1.868(10) |
| W(1A)-O(12A)                                              | 1.889(10) | W(1B)-O(12B)  | 1.880(10) |
| W(2A)-O(8A)                                               | 1.968(10) | W(2B)-O(8B)   | 1.947(10) |
| W(2A)-O(9A)                                               | 1.879(9)  | W(2B)-O(9B)   | 1.927(10) |
| W(3A)-O(10A)                                              | 1.907(10) | W(3B)-O(10B)  | 1.938(10) |
| W(3A)-O(11A)                                              | 1.799(10) | W(3B)-O(11B)  | 1.792(10) |
| W(4A)-O(23A)                                              | 1.836(10) | W(4B)-O(23B)  | 1.849(10) |
| W(4A)-O(7A)                                               | 1.925(10) | W(4B)-O(7B)   | 1.944(9)  |
| W(5A)-O(19A)                                              | 1.919(10) | W(5B)-O(19B)  | 1.910(10) |
| W(5A)-O(8A)                                               | 1.860(10) | W(5B)-O(8B)   | 1.883(9)  |
| W(6A)-O(19A)                                              | 1.913(10) | W(6B)-O(19B)  | 1.922(10) |
| W(6A)-O(9A)                                               | 1.920(9)  | W(6B)-O(9B)   | 1.897(9)  |
| W(7A)-O(21A)                                              | 1.803(10) | W(7B)-O(21B)  | 1.792(10) |
| W(7A)-O(10A)                                              | 1.936(9)  | W(7B)-O(10B)  | 1.918(9)  |
| W(8A)-O(22A)                                              | 1.807(10) | W(8B)-O(22B)  | 1.814(10) |
| W(8A)-O(23A)                                              | 1.998(11) | W(8B)-O(23B)  | 2.001(10) |
| W(8A)-O(12A)                                              | 1.924(10) | W(8B)-O(12B)  | 1.930(10) |
| W(9A)-O(33A)                                              | 1.846(10) | W(9B)-O(33B)  | 1.878(10) |
| W(9A)-O(34A)                                              | 1.931(10) | W(9B)-O(34B)  | 1.933(10) |
| W(10A)-O(34A)                                             | 1.884(10) | W(10B)-O(34B) | 1.884(10) |

**Table S2** continued

|                                                         |           |                                       |            |
|---------------------------------------------------------|-----------|---------------------------------------|------------|
| W(10A)-O(35A)                                           | 1.885(10) | W(10B)-O(35B)                         | 1.870(10)  |
| W(11A)-O(35A)                                           | 1.948(10) | W(11B)-O(35B)                         | 1.948(10)  |
| W(11A)-O(33A)                                           | 1.974(10) | W(11B)-O(33B)                         | 1.950(10)  |
| W(11A)-O(28A)                                           | 1.822(10) | W(11B)-O(28B)                         | 1.810 (11) |
|                                                         |           | average = 1.895 [1.792(10)-2.001(10)] |            |
| W-O <sub>e</sub> (O <sub>e</sub> : edge-sharing oxygen) |           |                                       |            |
| W(1A)-O(4A)                                             | 1.936(10) | W(1B)-O(4B)                           | 1.927(10)  |
| W(1A)-O(6A)                                             | 1.919(10) | W(1B)-O(6B)                           | 1.947(10)  |
| W(2A)-O(5A)                                             | 1.848(10) | W(2B)-O(5B)                           | 1.832(10)  |
| W(2A)-O(4A)                                             | 1.925(10) | W(2B)-O(4B)                           | 1.901(9)   |
| W(3A)-O(6A)                                             | 1.942(10) | W(3B)-O(6B)                           | 1.948(10)  |
| W(3A)-O(5A)                                             | 2.003(10) | W(3B)-O(5B)                           | 2.004(11)  |
| W(4A)-O(24A)                                            | 1.900(10) | W(4B)-O(24B)                          | 1.916(10)  |
| W(4A)-O(18A)                                            | 1.955(10) | W(4B)-O(18B)                          | 1.937(10)  |
| W(5A)-O(25A)                                            | 1.951(10) | W(5B)-O(25B)                          | 1.949(9)   |
| W(5A)-O(18A)                                            | 1.889(10) | W(5B)-O(18B)                          | 1.904(10)  |
| W(6A)-O(26A)                                            | 1.932(10) | W(6B)-O(26B)                          | 1.928(10)  |
| W(6A)-O(20A)                                            | 1.884(10) | W(6B)-O(20B)                          | 1.884(10)  |
| W(7A)-O(27A)                                            | 1.934(10) | W(7B)-O(27B)                          | 1.942(10)  |
| W(7A)-O(20A)                                            | 1.969(11) | W(7B)-O(20B)                          | 1.981(11)  |
| W(8A)-O(29A)                                            | 1.941(10) | W(8B)-O(29B)                          | 1.918(10)  |
| W(9A)-O(25A)                                            | 1.942(10) | W(9B)-O(25B)                          | 1.942(10)  |
| W(9A)-O(24A)                                            | 1.924(10) | W(9B)-O(24B)                          | 1.917(10)  |
| W(10A)-O(26A)                                           | 1.943(10) | W(10B)-O(26B)                         | 1.927(10)  |
| W(10A)-O(27A)                                           | 1.930(10) | W(10B)-O(27B)                         | 1.948(10)  |
| W(11A)-O(29A)                                           | 1.905(10) | W(11B)-O(29B)                         | 1.910(10)  |
|                                                         |           | average = 1.928 [1.832(10)-2.004(11)] |            |
| W-O <sub>a</sub> (oxygen coordinating to P atom)        |           |                                       |            |
| W(1A)-O(39A)                                            | 2.425(9)  | W(1B)-O(39B)                          | 2.429(9)   |
| W(2A)-O(39A)                                            | 2.503(10) | W(2B)-O(39B)                          | 2.490(9)   |
| W(3A)-O(39A)                                            | 2.395(10) | W(3B)-O(39B)                          | 2.424(10)  |
| W(4A)-O(36A)                                            | 2.445(9)  | W(4B)-O(36B)                          | 2.447(9)   |
| W(5A)-O(36A)                                            | 2.372(10) | W(5B)-O(36B)                          | 2.378(10)  |
| W(6A)-O(37A)                                            | 2.461(10) | W(6B)-O(37B)                          | 2.486(10)  |
| W(7A)-O(37A)                                            | 2.433(10) | W(7B)-O(37B)                          | 2.445(10)  |



**Table S2** continued

|                                      |           |                     |           |
|--------------------------------------|-----------|---------------------|-----------|
| W(8A)-O(38A)                         | 2.364(9)  | W(8B)-O(38B)        | 2.378(9)  |
| W(9A)-O(36A)                         | 2.440(10) | W(9B)-O(36B)        | 2.438(9)  |
| W(10A)-O(37A)                        | 2.411(9)  | W(10B)-O(37B)       | 2.409(9)  |
| W(11A)-O(38A)                        | 2.390(9)  | W(11B)-O(38B)       | 2.392(9)  |
| average = 2.425 [2.364(9)-2.503(10)] |           |                     |           |
| <hr/>                                |           |                     |           |
| P-O                                  |           |                     |           |
| P(1A)-O(36A)                         | 1.549(10) | P(1B)-O(36B)        | 1.547(10) |
| P(1A)-O(37A)                         | 1.546(10) | P(1B)-O(37B)        | 1.523(10) |
| P(1A)-O(38A)                         | 1.525(10) | P(1B)-O(38B)        | 1.514(10) |
| P(1A)-O(39A)                         | 1.536(10) | P(1B)-O(39B)        | 1.523(9)  |
| average = 1.533 [1.523(9)-1.547(10)] |           |                     |           |
| <hr/>                                |           |                     |           |
| O-P-O                                |           |                     |           |
| O(38A)-P(1A)-O(36A)                  | 110.9(6)  | O(38B)-P(1B)-O(36B) | 110.5(5)  |
| O(38A)-P(1A)-O(39A)                  | 109.7(6)  | O(38B)-P(1B)-O(39B) | 109.5(6)  |
| O(36A)-P(1A)-O(39A)                  | 109.1(6)  | O(36B)-P(1B)-O(39B) | 109.3(5)  |
| O(38A)-P(1A)-O(37A)                  | 109.7(5)  | O(38B)-P(1B)-O(37B) | 109.5(6)  |
| O(36A)-P(1A)-O(37A)                  | 108.0(6)  | O(36B)-P(1B)-O(37B) | 108.5(6)  |
| O(39A)-P(1A)-O(37A)                  | 109.3(5)  | O(39B)-P(1B)-O(37B) | 109.5(5)  |
| average = 109.5 [108.0(6)-110.9(6)]  |           |                     |           |
| <hr/>                                |           |                     |           |

**Table S3** Bond valence sum (BVS) calculations of W, Hf, O and P atoms for **1** in

Et<sub>2</sub>NH<sub>2</sub>-**1**

|        |       |        |       |        |       |
|--------|-------|--------|-------|--------|-------|
| O(1A)  | 1.703 | O(1B)  | 1.887 | W(1A)  | 5.917 |
| O(2A)  | 1.722 | O(2B)  | 1.712 | W(2A)  | 5.946 |
| O(3A)  | 1.774 | O(3B)  | 1.759 | W(3A)  | 6.208 |
| O(4A)  | 1.887 | O(4B)  | 2.006 | W(4A)  | 6.009 |
| O(5A)  | 1.993 | O(5B)  | 1.987 | W(5A)  | 5.893 |
| O(6A)  | 1.911 | O(6B)  | 1.885 | W(6A)  | 6.294 |
| O(7A)  | 2.033 | O(7B)  | 2.073 | W(7A)  | 6.176 |
| O(8A)  | 1.992 | O(8B)  | 2.000 | W(8A)  | 6.097 |
| O(9A)  | 2.059 | O(9B)  | 2.035 | W(9A)  | 6.113 |
| O(10A) | 1.985 | O(10B) | 1.941 | W(10A) | 6.121 |
| O(11A) | 1.986 | O(11B) | 1.947 | W(11A) | 6.011 |
| O(12A) | 2.067 | O(12B) | 2.078 |        |       |
| O(13A) | 1.694 | O(13B) | 1.774 | W(1B)  | 6.296 |
| O(14A) | 1.605 | O(14B) | 1.592 | W(2B)  | 6.040 |
| O(15A) | 1.842 | O(15B) | 1.793 | W(3B)  | 6.101 |
| O(16A) | 1.803 | O(16B) | 1.635 | W(4B)  | 6.053 |
| O(17A) | 1.717 | O(17B) | 1.822 | W(5B)  | 5.938 |
| O(18A) | 1.881 | O(18B) | 1.941 | W(6B)  | 6.157 |
| O(19A) | 2.051 | O(19B) | 2.025 | W(7B)  | 6.026 |
| O(20A) | 2.044 | O(20B) | 2.005 | W(8B)  | 6.224 |
| O(21A) | 2.035 | O(21B) | 2.017 | W(9B)  | 5.842 |
| O(22A) | 1.930 | O(22B) | 1.956 | W(10B) | 6.319 |
| O(23A) | 1.983 | O(23B) | 1.949 | W(11B) | 6.094 |
| O(24A) | 2.003 | O(24B) | 1.973 |        |       |
| O(25A) | 1.772 | O(25B) | 1.827 | O(1M)  | 1.170 |
| O(26A) | 1.858 | O(26B) | 1.987 | O(2M)  | 1.160 |
| O(27A) | 1.931 | O(27B) | 1.859 |        |       |
| O(28A) | 1.902 | O(28B) | 1.945 | Hf(1A) | 4.180 |
| O(29A) | 1.952 | O(29B) | 2.019 | Hf(1B) | 4.146 |
| O(30A) | 1.769 | O(30B) | 1.726 |        |       |
| O(31A) | 1.803 | O(31B) | 1.842 | P(1A)  | 4.984 |
| O(32A) | 1.803 | O(32B) | 1.703 | P(1B)  | 5.032 |

**Table S3** continued

|        |       |        |       |        |       |
|--------|-------|--------|-------|--------|-------|
| (33A)  | 2.009 | O(33B) | 2.002 | O(1WA) | 0.476 |
| O(34A) | 2.072 | O(34B) | 2.047 | O(1WB) | 0.490 |
| O(35A) | 1.995 | O(35B) | 2.065 |        |       |
| O(36A) | 2.013 | O(36B) | 1.961 |        |       |
| O(37A) | 1.929 | O(37B) | 1.958 |        |       |
| O(38A) | 1.884 | O(38B) | 2.099 |        |       |
| O(39A) | 1.976 | O(39B) | 1.955 |        |       |

---

**Table S4** Bond valence sum (BVS) calculations of W, Zr, O and P atoms for **2** in

Et<sub>2</sub>NH<sub>2</sub>-**2**

|        |       |        |       |        |       |
|--------|-------|--------|-------|--------|-------|
| O(1A)  | 1.807 | O(1B)  | 1.774 | W(1A)  | 6.160 |
| O(2A)  | 1.857 | O(2B)  | 1.778 | W(2A)  | 6.225 |
| O(3A)  | 1.764 | O(3B)  | 1.778 | W(3A)  | 6.169 |
| O(4A)  | 1.929 | O(4B)  | 2.018 | W(4A)  | 6.220 |
| O(5A)  | 1.998 | O(5B)  | 2.049 | W(5A)  | 6.152 |
| O(6A)  | 1.929 | O(6B)  | 1.842 | W(6A)  | 6.060 |
| O(7A)  | 2.054 | O(7B)  | 2.071 | W(7A)  | 6.166 |
| O(8A)  | 2.038 | O(8B)  | 2.018 | W(8A)  | 6.088 |
| O(9A)  | 2.100 | O(9B)  | 2.029 | W(9A)  | 6.107 |
| O(10A) | 1.977 | O(10B) | 1.942 | W(10A) | 6.025 |
| O(11A) | 1.961 | O(11B) | 1.954 | W(11A) | 6.150 |
| O(12A) | 2.031 | O(12B) | 2.071 |        |       |
| O(13A) | 1.807 | O(13B) | 1.754 | W(1B)  | 6.166 |
| O(14A) | 1.708 | O(14B) | 1.736 | W(2B)  | 6.189 |
| O(15A) | 1.774 | O(15B) | 1.892 | W(3B)  | 6.089 |
| O(16A) | 1.783 | O(16B) | 1.703 | W(4B)  | 6.075 |
| O(17A) | 1.722 | O(17B) | 1.764 | W(5B)  | 6.092 |
| O(18A) | 1.981 | O(18B) | 1.983 | W(6B)  | 6.213 |
| O(19A) | 2.005 | O(19B) | 2.006 | W(7B)  | 6.118 |
| O(20A) | 1.962 | O(20B) | 1.934 | W(8B)  | 6.132 |
| O(21A) | 2.001 | O(21B) | 2.005 | W(9B)  | 6.013 |
| O(22A) | 1.916 | O(22B) | 1.923 | W(10B) | 6.131 |
| O(23A) | 2.048 | O(23B) | 1.909 | W(11B) | 6.178 |
| O(24A) | 2.028 | O(24B) | 2.004 |        |       |
| O(25A) | 1.847 | O(25B) | 1.852 | O(1M)  | 1.100 |
| O(26A) | 1.892 | O(26B) | 1.944 | O(2M)  | 1.106 |
| O(27A) | 1.921 | O(27B) | 1.854 |        |       |
| O(28A) | 1.891 | O(28B) | 1.937 | Zr(1A) | 3.936 |
| O(29A) | 1.970 | O(29B) | 2.016 | Zr(1B) | 3.934 |
| O(30A) | 1.774 | O(30B) | 1.764 |        |       |
| O(31A) | 1.680 | O(31B) | 1.745 | P(1A)  | 4.940 |
| O(32A) | 1.769 | O(32B) | 1.712 | P(1B)  | 5.108 |

**Table S4** continued

|        |       |        |       |        |       |
|--------|-------|--------|-------|--------|-------|
| O(33A) | 2.069 | O(33B) | 2.026 | O(1WA) | 0.437 |
| O(34A) | 2.056 | O(34B) | 2.051 | O(1WB) | 0.455 |
| O(35A) | 2.010 | O(35B) | 2.055 |        |       |
| O(36A) | 1.977 | O(36B) | 1.979 |        |       |
| O(37A) | 1.952 | O(37B) | 2.009 |        |       |
| O(38A) | 1.860 | O(38B) | 1.886 |        |       |
| O(39A) | 1.978 | O(39B) | 2.006 |        |       |

---
